# Supplementary material for: Cost estimation for the monitoring instrumentation of landslide early warning systems
Source: Copernicus journal article supplement (doi:10.5194/nhess-23-3913-2023), 2023-12-24
Supplement: Supplementary file 1 [file nhess-23-3913-2023-supplement.pdf]

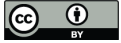

*Supplement of*

## **Cost estimation for the monitoring instrumentation of landslide early warning systems**

**Marta Sapena et al.**

*Correspondence to:* Marta Sapena (marta.sapena-moll@dlr.de)

The copyright of individual parts of the supplement might differ from the article licence.

## Supplementary material

**Table S1.** Socio-demographic and topographic factors and cost estimation for suitable sites for the installation of landslide EWS. Total area of the site in hectares (Area), total population (Pop.), population density as people per hectare (Pop/ha), vulnerable population (Vul. Pop.), built-up density as the total building area per ha (BU den.), road density (Road den.), mean slope of the site in degrees (Slope), aspect of the main orientation of the slope (Asp.), landslide susceptibility (Susc.), sensor density as the number of sensors per ha (Sensor den.), total number of sensors, infrastructure and subsurface sensors (Total sens., Infr. Sens and Subs. sens) per site, number of gateways, total estimated cost and cost per person.

| Neighbourhood                     | Socio-demographic and topographic factors |       |        |        |           |         |           |       |      | EWS sensors and cost estimation |             |             |             |             |          |          |              |
|-----------------------------------|-------------------------------------------|-------|--------|--------|-----------|---------|-----------|-------|------|---------------------------------|-------------|-------------|-------------|-------------|----------|----------|--------------|
|                                   | Site                                      | Area  | Pop.   | Pop/ha | Vul. pop. | BU den. | Road den. | Slope | Asp. | Susc.                           | Sensor den. | Total sens. | Infr. sens. | Subs. sens. | Gateways | Cost (€) | Cost (€/per) |
| Santo Dom.Savio 1                 | 1                                         | 22.54 | 7,680  | 341    | 7,680     | 0.351   | 366       | 25    | W    | 0.801                           | 6.4         | 145         | 51          | 94          | 1        | 65,070   | 8            |
| La Avanzada                       | 2                                         | 20.14 | 4,875  | 242    | 4,692     | 0.218   | 293       | 25    | NW   | 0.762                           | 6.1         | 123         | 27          | 96          | 1        | 60,332   | 12           |
| Carpinelo                         | 3                                         | 19.85 | 4,243  | 214    | 4,243     | 0.193   | 272       | 27    | W    | 0.792                           | 6.3         | 126         | 24          | 102         | 1        | 62,618   | 15           |
| Carpinelo / Maria cano-carambolas | 4                                         | 45.93 | 13,875 | 302    | 13,848    | 0.257   | 319       | 24    | W    | 0.741                           | 5.9         | 272         | 70          | 202         | 2        | 130,223  | 9            |
| Maria cano-carambolas             | 5                                         | 27.62 | 3,601  | 130    | 3,601     | 0.139   | 248       | 29    | W    | 0.826                           | 6.6         | 183         | 25          | 157         | 2        | 94,866   | 26           |
| Oriente                           | 6                                         | 32.64 | 3,464  | 106    | 3,278     | 0.139   | 227       | 22    | SW   | 0.589                           | 4.7         | 154         | 21          | 132         | 2        | 80,634   | 23           |
| Oriente                           | 7                                         | 36.32 | 5,532  | 152    | 5,532     | 0.166   | 299       | 31    | W    | 0.785                           | 6.3         | 228         | 38          | 190         | 2        | 115,710  | 21           |
| La Cruz                           | 8                                         | 52.19 | 9,522  | 182    | 9,522     | 0.199   | 287       | 26    | SW   | 0.751                           | 6           | 314         | 62          | 251         | 3        | 156,651  | 16           |
| La Cruz                           | 9                                         | 13.69 | 1,114  | 81     | 1,114     | 0.082   | 169       | 27    | SW   | 0.766                           | 6.1         | 84          | 7           | 77          | 1        | 45,127   | 41           |
| Versalles No.2                    | 10                                        | 41.91 | 8,595  | 205    | 8,578     | 0.163   | 249       | 27    | W    | 0.757                           | 6.1         | 254         | 41          | 212         | 2        | 128,462  | 15           |
| Llanaditas                        | 11                                        | 28.54 | 8,152  | 286    | 8,152     | 0.254   | 316       | 27    | W    | 0.707                           | 5.7         | 161         | 41          | 120         | 2        | 79,088   | 10           |
| Llanaditas                        | 12                                        | 25.39 | 6,716  | 265    | 6,716     | 0.248   | 311       | 26    | W    | 0.728                           | 5.8         | 148         | 37          | 111         | 2        | 73,037   | 11           |
| La Libertad                       | 13                                        | 23.59 | 5,953  | 252    | 5,953     | 0.226   | 276       | 20    | SW   | 0.619                           | 4.9         | 117         | 26          | 90          | 1        | 57,174   | 10           |
| San Antonio                       | 14                                        | 21.34 | 4,990  | 234    | 4,934     | 0.264   | 350       | 23    | SW   | 0.729                           | 5.8         | 125         | 33          | 92          | 1        | 59,472   | 12           |
| Villa Turbay                      | 15                                        | 16.49 | 1,945  | 118    | 1,873     | 0.146   | 250       | 31    | W    | 0.846                           | 6.8         | 112         | 16          | 95          | 1        | 57,296   | 29           |
| Villa Lilliam                     | 16                                        | 40.25 | 8,168  | 203    | 8,151     | 0.24    | 278       | 27    | SW   | 0.786                           | 6.3         | 253         | 61          | 192         | 2        | 122,488  | 15           |
| La Sierra                         | 17                                        | 25.98 | 3,719  | 143    | 3,658     | 0.189   | 276       | 28    | S    | 0.703                           | 5.6         | 146         | 28          | 119         | 2        | 74,756   | 20           |
| Juan Pablo II                     | 18                                        | 46.13 | 8,970  | 194    | 8,740     | 0.201   | 247       | 23    | N    | 0.609                           | 4.9         | 225         | 45          | 179         | 2        | 111,792  | 12           |
| Cucaracho                         | 19                                        | 32.16 | 6,579  | 205    | 2,161     | 0.176   | 232       | 20    | S    | 0.642                           | 5.1         | 165         | 29          | 136         | 2        | 84,471   | 13           |
| Área exp.Pajarito                 | 20                                        | 15.68 | 4,989  | 318    | 0         | 0.109   | 314       | 15    | SE   | 0.537                           | 4.3         | 67          | 7           | 60          | 1        | 36,180   | 7            |

|                                   |    |       |        |     |        |       |     |    |    |       |     |     |    |     |   |         |    |
|-----------------------------------|----|-------|--------|-----|--------|-------|-----|----|----|-------|-----|-----|----|-----|---|---------|----|
| Área exp.Pajarito                 | 21 | 23.57 | 12,068 | 512 | 0      | 0.117 | 239 | 15 | S  | 0.557 | 4.5 | 105 | 12 | 93  | 1 | 54,931  | 5  |
| Área exp. pajarito/ San Cristóbal | 22 | 47.96 | 11,224 | 234 | 1,416  | 0.13  | 205 | 17 | S  | 0.563 | 4.5 | 216 | 28 | 188 | 2 | 111,899 | 10 |
| Santa Margarita                   | 23 | 23.45 | 4,134  | 176 | 4,134  | 0.202 | 278 | 19 | SE | 0.6   | 4.8 | 113 | 23 | 90  | 1 | 55,946  | 14 |
| Olaya Herrera                     | 24 | 17.83 | 2,080  | 117 | 2,042  | 0.117 | 278 | 28 | N  | 0.734 | 5.9 | 105 | 12 | 92  | 1 | 54,723  | 26 |
| Olaya Herrera                     | 25 | 28.35 | 8,884  | 313 | 8,877  | 0.262 | 249 | 26 | N  | 0.618 | 4.9 | 140 | 37 | 103 | 2 | 68,985  | 8  |
| Juan XXIII La Quiebra             | 26 | 13.09 | 1,673  | 128 | 1,648  | 0.133 | 145 | 26 | S  | 0.662 | 5.3 | 69  | 9  | 60  | 1 | 36,712  | 22 |
| El Pesebre                        | 27 | 14.36 | 5,098  | 355 | 2,607  | 0.256 | 218 | 26 | S  | 0.593 | 4.7 | 68  | 17 | 51  | 1 | 33,686  | 7  |
| Nuevos Conquist.                  | 28 | 38.95 | 11,194 | 287 | 11,154 | 0.268 | 228 | 25 | NE | 0.673 | 5.4 | 210 | 56 | 154 | 2 | 100,663 | 9  |
| El Corazón                        | 29 | 12.69 | 2,394  | 189 | 2,101  | 0.254 | 188 | 18 | S  | 0.509 | 4.1 | 52  | 13 | 39  | 1 | 26,129  | 11 |
| Betania                           | 30 | 19.88 | 4,476  | 225 | 3,592  | 0.237 | 216 | 19 | NE | 0.53  | 4.2 | 84  | 20 | 64  | 1 | 41,616  | 9  |
| El Rincón                         | 31 | 25.84 | 7,421  | 287 | 5,955  | 0.265 | 216 | 23 | N  | 0.541 | 4.3 | 112 | 30 | 82  | 2 | 55,838  | 8  |
| San Ant. de Prado                 | 32 | 27.12 | 4,516  | 166 | 4,119  | 0.2   | 191 | 18 | SE | 0.569 | 4.6 | 124 | 25 | 99  | 2 | 63,494  | 14 |

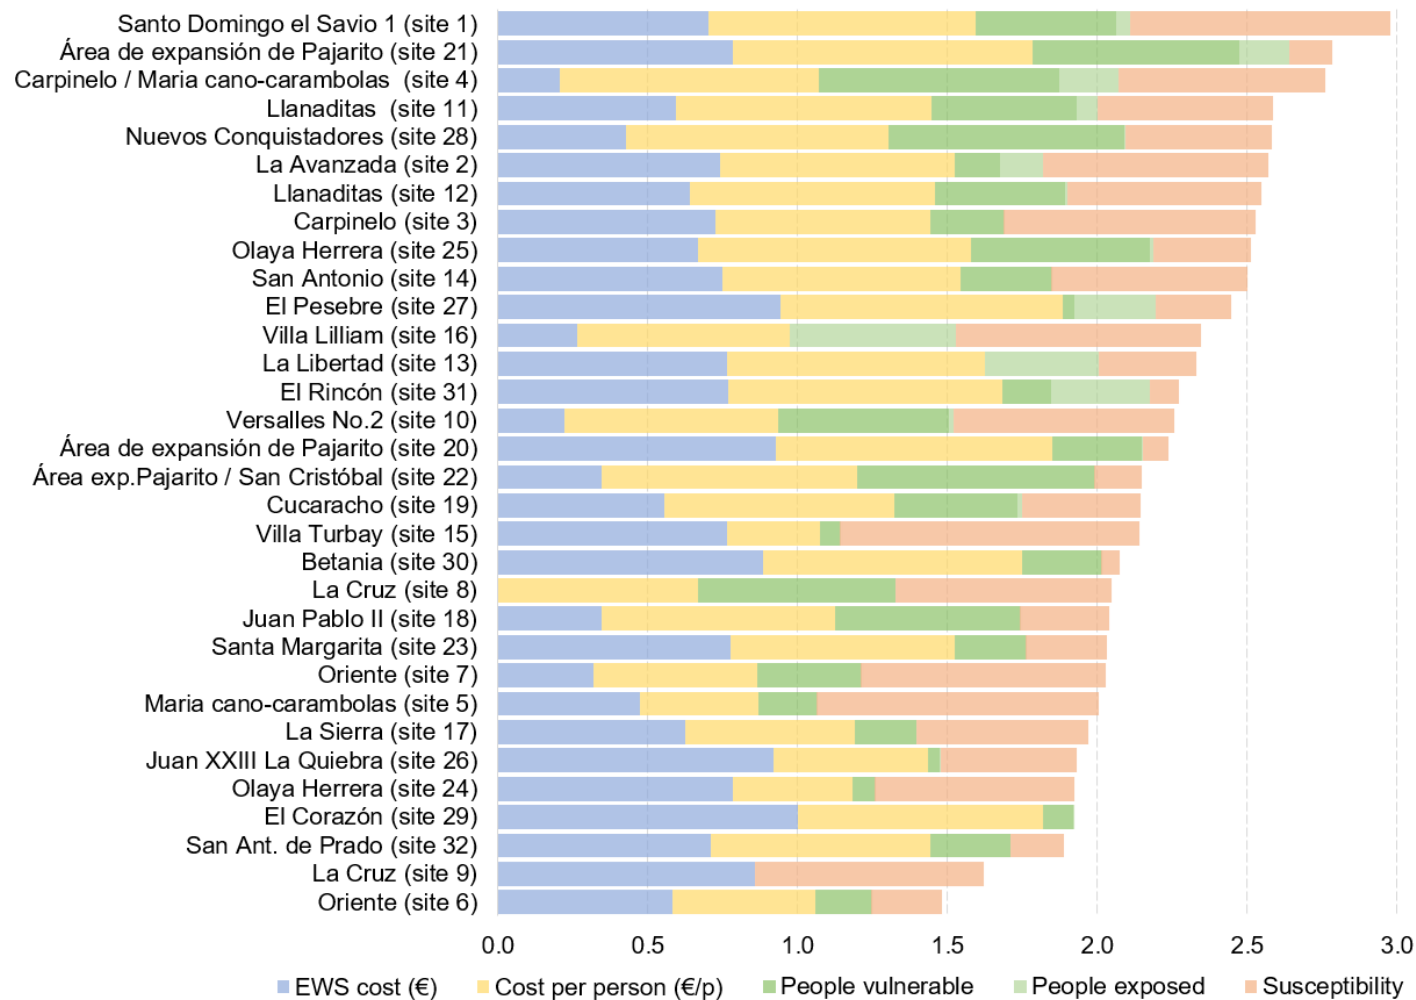

**Figure S1.** Site-specific landslide EWS prioritization based on the combination of four cost-effectiveness scenarios: overall cost of ESW, cost per person, total population exposed and vulnerable, and landslide susceptibility. Values are normalized in a min-max scale, where 1 is the highest priority per scenario. The combined scaled values show the priority considering all scenarios, the higher the value, the most efficient.
